# Supplementary material for: Precision Education Tools for Pediatrics Trainees: A Mixed-Methods Multi-Site Usability Assessment
Source: bioRxiv or medRxiv preprint supplement (doi:10.1101/2024.07.23.24310890), 2024-07-24

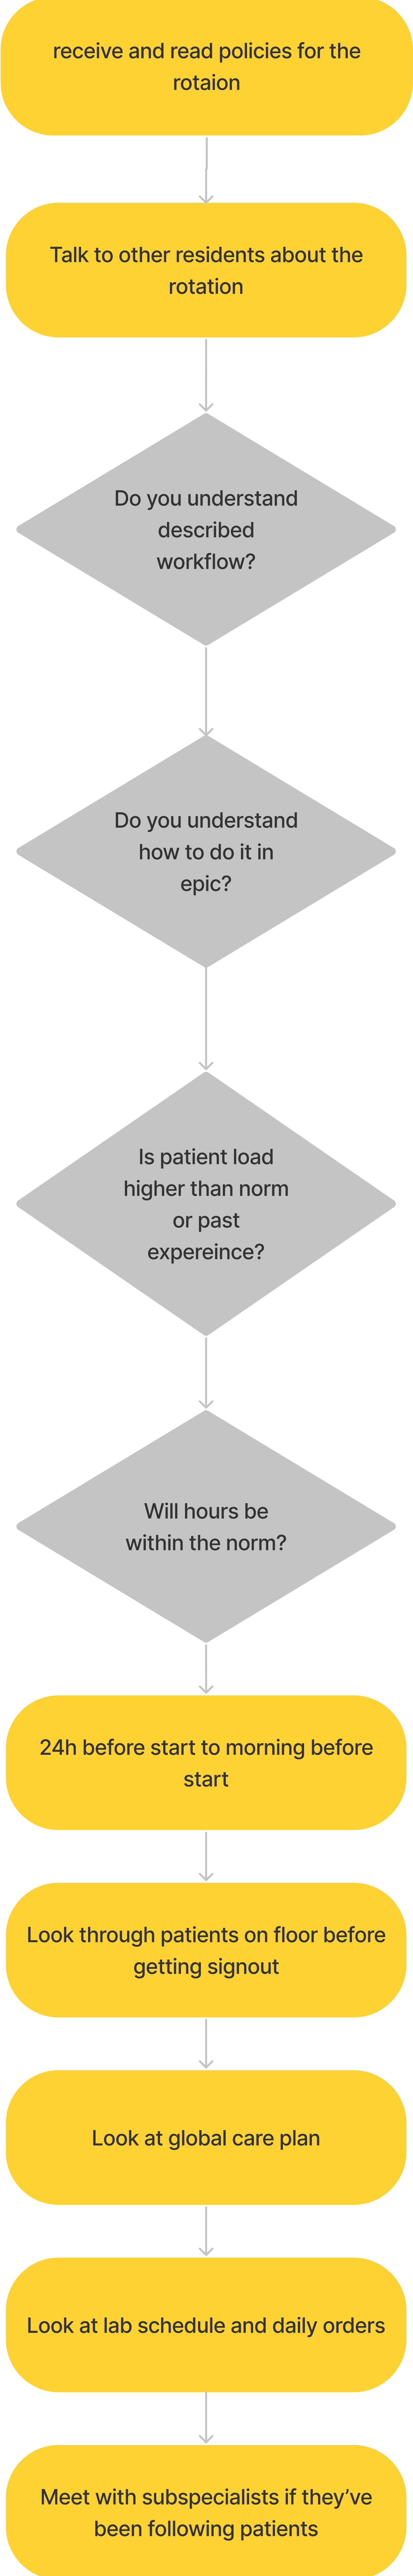

Supplement: Supplementary file [file media-9.pdf]
